# Supplementary material
Source: Springer Nature journal article supplement (https://www.springermedizin.de/resource/supplementary/13012_2012_660_MOESM1_ESM.pdf/9630460)

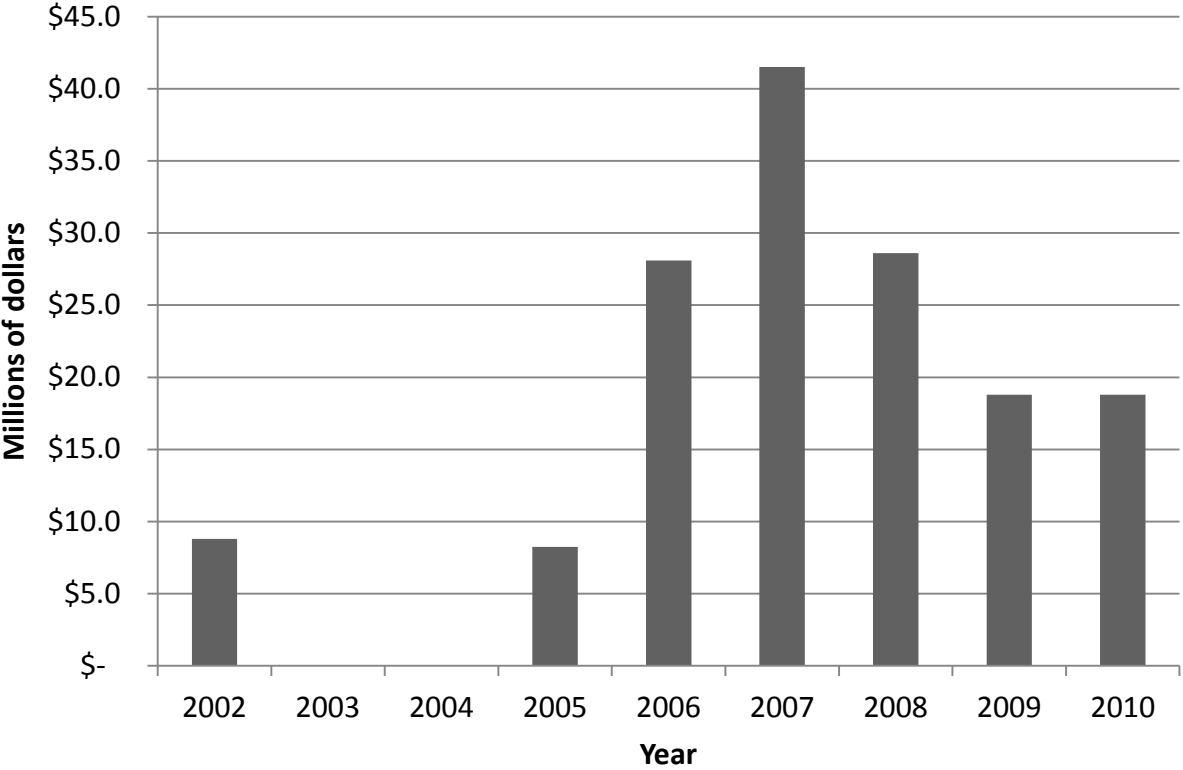

Supplement: MOESM1 [file 9630460]
